# Supplementary material for: Broadening the Perspective of Traditional Lecturing vs. Active Learning in Introductory College Biology
Source: Research Square preprint supplement (doi:10.21203/rs.3.rs-5702022/v1), 2025-01-02
Supplement: Supplementary file 1 [file 98025b105f1974a1d6d13fa1.pdf]

### Active Learning: DNA Replication Activity

*Each person in the group chooses a DNA Replication Component. Take 10mins using your smart phones and computers to research these and fill in the table. Assist your team members with theirs if you finish early.*

| <u>DNA Replication Component</u> | <u>What is its Function</u>                                                                                                                                                                                 | <u>What happens if function is impaired</u>                                                | <u>Does this component have any limitations</u>                                                            | <u>When does it function relative to the others</u>                           |
|----------------------------------|-------------------------------------------------------------------------------------------------------------------------------------------------------------------------------------------------------------|--------------------------------------------------------------------------------------------|------------------------------------------------------------------------------------------------------------|-------------------------------------------------------------------------------|
| DNA Polymerase I                 | strings together deoxyribonucleotides as it removes and replaces the RNA primer                                                                                                                             | Replication cannot proceed or excessive mistakes in copying are made, leading to mutations | can only polymerize DNA in a 5'-3' manner and requires a foundation from which to start DNA polymerization | After DNA polymerase III and before Ligase                                    |
| Ligase and Okazaki fragments     | Enzyme that catalyzes final phosphodiester bond between adjacent okazaki fragments (segments of lagging strand) and corresponding leading strand after primers have been replaced with deoxyribonucleotides | Likely strand dissociations and DNA damage                                                 |                                                                                                            | Ligase is the last of these components and functions after DNA polymerase I   |
| DNA Polymerase III               | Main polymerase enzyme that strings together deoxyribonucleotides                                                                                                                                           | Replication cannot proceed or excessive mistakes in copying are made, leading to mutations | can only polymerize DNA in a 5'-3' manner and requires a foundation from which to start DNA polymerization | After primase and before DNA polymerase I                                     |
| Primase and the primer           | Primase is an enzyme that polymerizes a short, temporary RNA-based primer so that DNA polymerase will have some foundation in which to start DNA synthesis                                                  | DNA Replication cannot proceed                                                             | primase can only string ribonucleotides together in a 5'-3' manner                                         | After SSBPs and before DNA polymerase III                                     |
| Helicase and SSBPs               | Enzyme at the front end of a DNA replication fork that unwinds the DNA double helix by separating its complementary bases                                                                                   | DNA Replication cannot begin because the template strands wont be seperated                |                                                                                                            | Helicase is the first of these components and functions just before the SSBPs |
| Topoisomerase                    | Enzyme that works ahead of the replication fork to cut and then reseal the double helix in order to relieve accumulated torsional stress                                                                    | DNA supercoiling and breakage                                                              |                                                                                                            | It functions after but in concert with Helicase                               |

### Active Learning: DNA Replication Activity

*Each person in the group chooses a DNA Replication Component. Take 10mins using your smart phones and computers to research these and fill in the table. Assist your team members with theirs if you finish early.*

| <u>DNA Replication Component</u> | <u>What is its Function</u> | <u>What happens if function is impaired</u> | <u>Does this component have any limitations</u> | <u>When does it function relative to the others</u> |
|----------------------------------|-----------------------------|---------------------------------------------|-------------------------------------------------|-----------------------------------------------------|
| DNA Polymerase I                 |                             |                                             |                                                 |                                                     |
| Ligase and Okazaki fragments     |                             |                                             |                                                 |                                                     |
| DNA Polymerase III               |                             |                                             |                                                 |                                                     |
| Primase and the primer           |                             |                                             |                                                 |                                                     |
| Helicase and SSBPs               |                             |                                             |                                                 |                                                     |
| Topoisomerase                    |                             |                                             |                                                 |                                                     |
